# Supplementary material for: Unraveling the Composition of the Root-Associated Bacterial Microbiota of Phragmites australis and Typha latifolia
Source: PubMed Central journal article supplement (PMC6083059; doi:10.3389/fmicb.2018.01650), 2018-08-02
Supplement: Data_Sheet_2.pdf [file Data_Sheet_2.pdf]

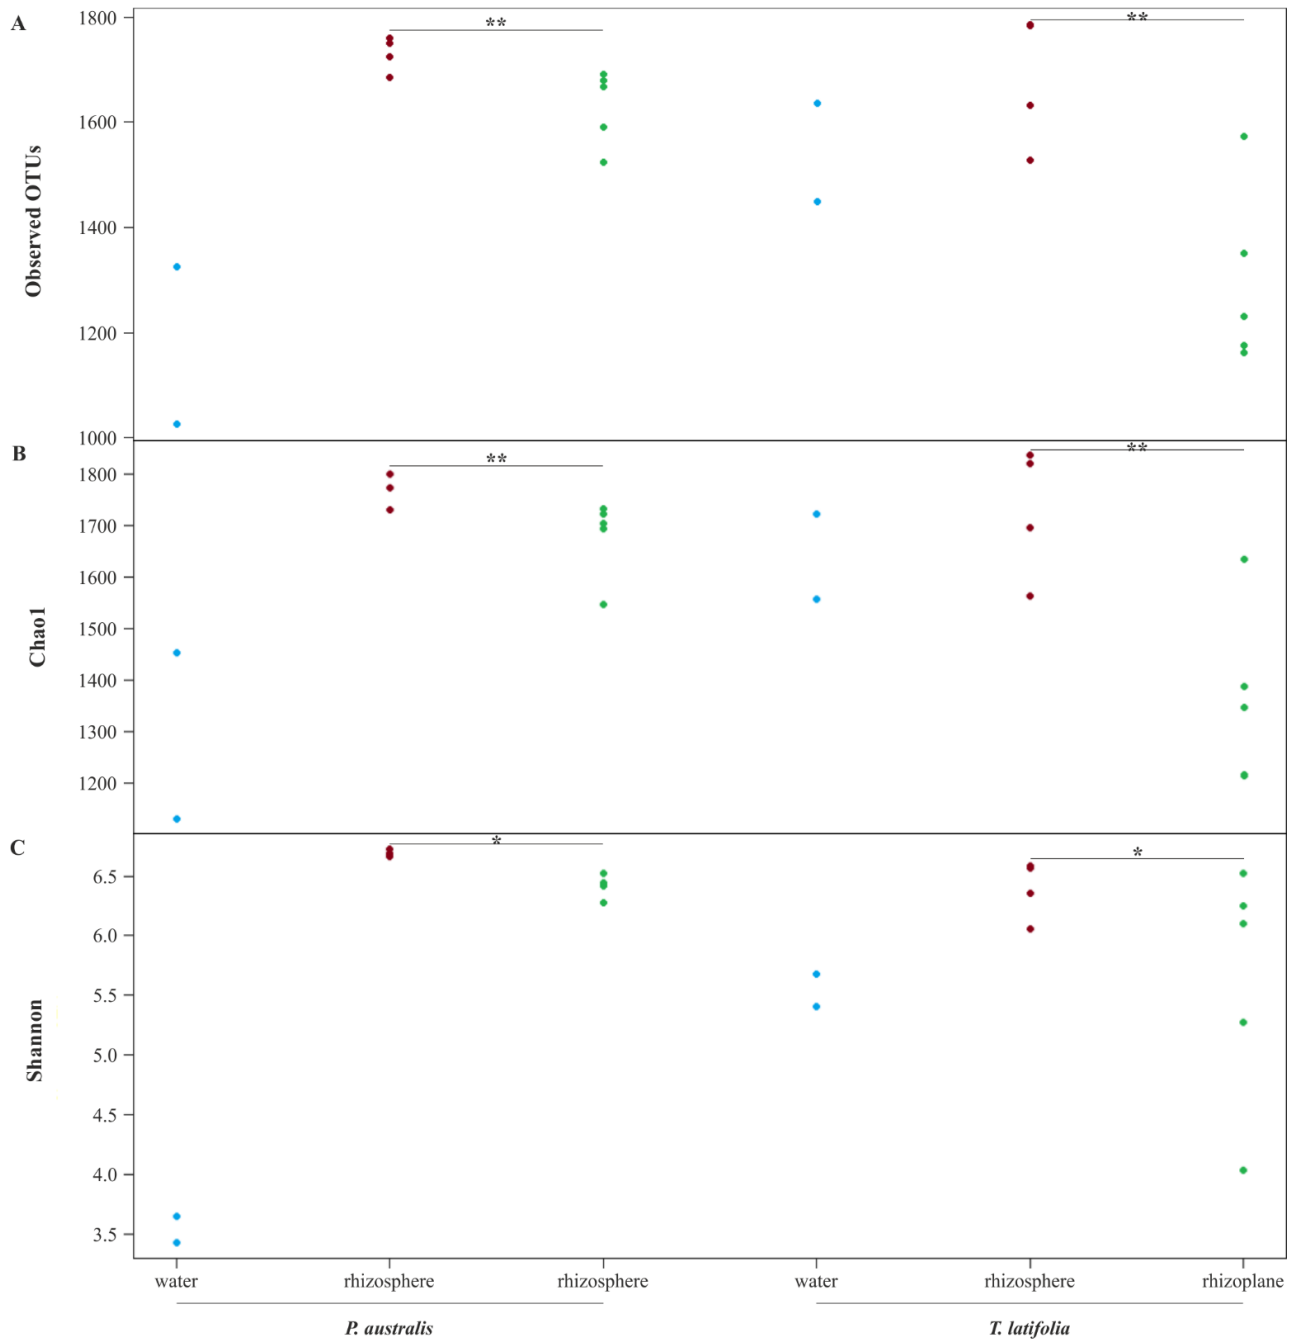

**SUPPLEMENTARY FIGURE 2. Alpha diversity calculation for samples set2.** OTUs richness of water, rhizosphere and rhizoplane microbiotas of *Phragmites australis* and *Typha latifolia* indicated by number of Observed OTUs (A) and by Chao1 index (B). The OTUs evenness of the two plants microbiotas is shown by Shannon index (C). Dots represent single samples. Asterisks denote statistically significant differences between rhizosphere and rhizoplane microhabitats (\*\*P < 0.01, \* P < 0.05).
